# Supplementary material for: Investigations on the Photoregulation of Chloroplast Movement and Leaf Positioning in Arabidopsis
Source: PubMed Central journal article supplement — Plant Cell Physiol. 2012 Jul 10;54(1):48–56. doi: 10.1093/pcp/pcs098 (PMC3539441; doi:10.1093/pcp/pcs098), 2012-07-10
Supplement: supp_pcs098_pcp-2012-e-00023-File003.pdf [file supp_pcs098_pcp-2012-e-00023-File003.pdf]

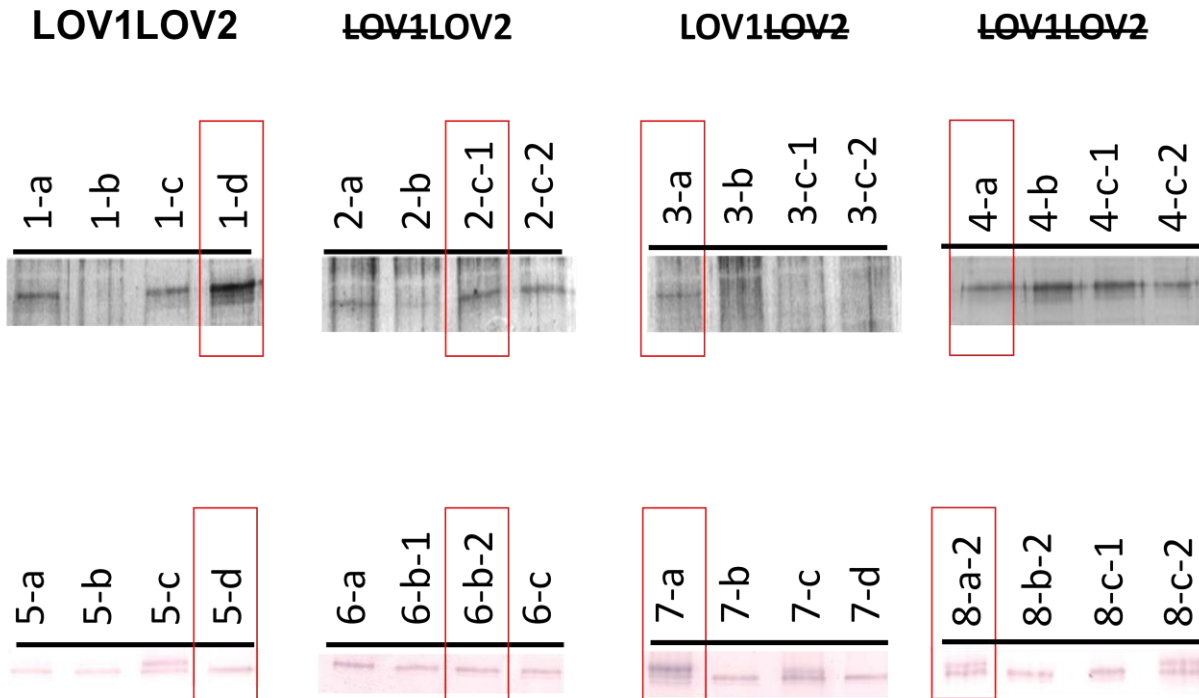

**Fig. S1** Expression levels of PHOT1 or PHOT2 proteins in the several transformants. Western blots of plant protein extracts were performed using either an anti-phot1 polyclonal antibody or a purified polyclonal phot2 antibody as described before (Cho et al. 2007). Boxed lines were examined for the physiological phenotypes mediated by phototropins. Table 1. Leaf flattening phenotypes for transformant lines 5-a, 5-c, and 5-d. The leaf expansion index was determined as the ratio of the width of the leaf before unrolling the edges to that after unrolling them. Mature leaves from at least three different plants were arbitrarily measured.
